# Supplementary material for: Soluble form of Lingo2, an autism spectrum disorder-associated molecule, functions as an excitatory synapse organizer in neurons
Source: Research Square preprint supplement (doi:10.21203/rs.3.rs-2923926/v1), 2023-09-22
Supplement: Supplementary file 1 [file d5c0d5b720c6712a74a58bad.xlsx]

## Sheet: Identified proteins
									Normalized abundance						Raw abundance						Spectral counts
									Condition 1			Condition 2			Condition 1			Condition 2			Condition 1			Condition 2
Accession	Peptide count	Unique peptides	Confidence score	Anova (p)	Max fold change	Highest mean condition	Lowest mean condition	Description	Control-1	Control-2	Control-3	VPA-1	VPA-2	VPA-3	Control-1	Control-2	Control-3	VPA-1	VPA-2	VPA-3	Control-1	Control-2	Control-3	VPA-1	VPA-2	VPA-3
P58252	3	3	123.97	0.0263204	1.30958	Condition 1	Condition 2	Elongation factor 2 OS=Mus musculus GN=Eef2 PE=1 SV=2	106868	87744	106935	72116	75238	82908	154087	137056	117201	85974	75238	76259	1	3	2	1	2	2
Q3URE9	2	1	104.33	0.0355332	3.10464	Condition 2	Condition 1	Leucine-rich repeat and immunoglobulin-like domain-containing nogo receptor-interacting protein 2 OS=Mus musculus GN=Lingo2 PE=2 SV=1	1238	883	582	4010	2840	1542	1785	1380	638	4780	2840	1419	0	0	0	1	0	0
Q6P5F9	1	1	46.3	0.0390927	1.86433	Condition 1	Condition 2	Exportin-1 OS=Mus musculus GN=Xpo1 PE=1 SV=1	4274	3755	6824	3054	2550	2363	6163	5865	7480	3641	2550	2174	0	0	0	1	0	0
Q8BKV1	4	4	301.16	0.0703388	1.73608	Condition 1	Condition 2	Glypican-2 OS=Mus musculus GN=Gpc2 PE=2 SV=1	306395	167433	172904	140048	107352	125124	441773	261530	189503	166961	107352	115090	3	4	3	3	1	2
Q91XD6	1	1	43.24	0.0754919	1.45173	Condition 1	Condition 2	Vacuolar protein-sorting-associated protein 36 OS=Mus musculus GN=Vps36 PE=1 SV=1	405498	546910	493850	354527	251096	390611	584665	854270	541262	422656	251096	359286	0	0	0	0	1	1
Q04447	2	2	84.39	0.0964115	2.7108	Condition 1	Condition 2	Creatine kinase B-type OS=Mus musculus GN=Ckb PE=1 SV=1	23565	10428	6640	6905	3998	4086	33977	16289	7277	8232	3998	3758	1	1	0	0	0	0
P60710;P62737	9	7	479.74	0.107889	3.33609	Condition 1	Condition 2	Actin, cytoplasmic 1 OS=Mus musculus GN=Actb PE=1 SV=1	362937	225057	72176	77823	50873	69192	523298	351538	79105	92778	50873	63643	5	3	2	2	3	2
O35375	1	1	77.44	0.138919	1.39293	Condition 2	Condition 1	Neuropilin-2 OS=Mus musculus GN=Nrp2 PE=1 SV=2	12803	20823	17650	25720	27006	18698	18460	32525	19345	30662	27006	17199	1	0	0	1	0	0
Q99JX4	1	1	42.58	0.147131	1.35814	Condition 1	Condition 2	Eukaryotic translation initiation factor 3 subunit M OS=Mus musculus GN=Eif3m PE=1 SV=1	123391	83417	84109	63495	63373	87334	177911	130297	92184	75697	63373	80330	1	0	0	0	0	0
Q80W15	2	2	136.12	0.183337	1.81333	Condition 1	Condition 2	Insulin-like growth factor-binding protein-like 1 OS=Mus musculus GN=Igfbpl1 PE=2 SV=1	104384	91812	44719	42037	25956	64865	150505	143410	49012	50115	25956	59664	2	0	0	1	0	1
Q6NZL8	1	1	50.59	0.191259	1.93738	Condition 1	Condition 2	Signal peptide, CUB and EGF-like domain-containing protein 1 OS=Mus musculus GN=Scube1 PE=2 SV=2	803	766	1775	743	717	266	1158	1197	1945	886	717	245	1	0	1	0	0	0
Q9R1Q9	6	6	398.6	0.219787	1.71589	Condition 2	Condition 1	V-type proton ATPase subunit S1 OS=Mus musculus GN=Atp6ap1 PE=1 SV=1	278920	95842	317189	322114	301884	563314	402159	149705	347641	384013	301884	518139	3	4	4	3	3	5
P02662	1	1	38.45	0.227416	2.98599	Condition 2	Condition 1	Contaminant (Alpha-S1-casein)	1021	344	2300	2344	1213	7385	1471	537	2521	2794	1213	6793	0	0	0	0	0	1
P04264;P03995;P04104;P11679;Q6IFZ6;Q6IFZ9	27	20	2107.35	0.231657	1.49358	Condition 2	Condition 1	Contaminant (Keratin, type II cytoskeletal 1)	1972222	2533269	5411606	6333938	3806607	4671451	2843634	3956953	5931145	7551117	3806607	4296825	11	15	19	26	20	21
A2A8L5	7	7	310.96	0.234941	1.34475	Condition 1	Condition 2	Receptor-type tyrosine-protein phosphatase F OS=Mus musculus GN=Ptprf PE=1 SV=1	149230	93684	149208	124194	76340	91060	215166	146333	163532	148061	76340	83758	5	1	3	2	1	1
Q9QUR8	1	1	55.32	0.254193	1.21625	Condition 2	Condition 1	Semaphorin-7A OS=Mus musculus GN=Sema7a PE=1 SV=1	8099	6004	9115	9824	7862	10553	11677	9378	9990	11711	7862	9707	1	1	1	1	1	0
Q9DBT9	1	1	75	0.290927	1.2137	Condition 2	Condition 1	Dimethylglycine dehydrogenase, mitochondrial OS=Mus musculus GN=Dmgdh PE=1 SV=1	14134	12429	17407	21507	14169	17690	20379	19413	19078	25640	14169	16271	0	0	1	0	1	1
P16858	1	1	84.01	0.296888	1.50442	Condition 1	Condition 2	Glyceraldehyde-3-phosphate dehydrogenase OS=Mus musculus GN=Gapdh PE=1 SV=2	8128	14362	8565	2810	4378	13455	11719	22434	9388	3350	4378	12376	1	1	0	0	0	1
Q3UV17	4	1	194.51	0.333434	1.45283	Condition 2	Condition 1	Keratin, type II cytoskeletal 2 oral OS=Mus musculus GN=Krt76 PE=1 SV=1	74459	107143	248467	280400	132603	211816	107358	167357	272321	334284	132603	194829	0	0	1	1	0	0
P35505	1	1	67.64	0.334787	2.9757	Condition 1	Condition 2	Fumarylacetoacetase OS=Mus musculus GN=Fah PE=1 SV=2	13410	5512	1212	4548	852	1366	19335	8610	1329	5422	852	1256	1	0	0	0	0	0
P35527	20	19	1468.67	0.36832	1.67132	Condition 2	Condition 1	Contaminant (Keratin, type I cytoskeletal 9)	899082	1235969	3450486	5223366	1463662	2648210	1296335	1930577	3781748	6227130	1463662	2435837	8	9	13	22	11	12
P02768	19	1	1208.87	0.37004	1.31078	Condition 1	Condition 2	Contaminant (Serum albumin)	219978	336688	220236	212777	276105	103819	317174	525905	241380	253665	276105	95493	1	0	0	0	0	0
Q9CVI2	1	1	36.41	0.372525	1.60403	Condition 1	Condition 2	Protein FAM133B OS=Mus musculus GN=Fam133b PE=1 SV=3	2657	7570	8056	3913	3763	3722	3831	11825	8829	4665	3763	3423	0	0	0	1	0	0
Q05909	1	1	34.22	0.380387	1.51405	Condition 2	Condition 1	Receptor-type tyrosine-protein phosphatase gamma OS=Mus musculus GN=Ptprg PE=1 SV=1	7214	2511	1822	9595	3994	3895	10402	3923	1996	11439	3994	3582	0	0	0	0	0	1
P00761	11	11	813.31	0.383103	1.11977	Condition 2	Condition 1	Contaminant (Trypsin)	31308141	39444074	46890956	39757362	45314619	46661157	45141427	61611423	51392700	47397449	45314619	42919172	15	15	21	19	22	20
Q9WV91	5	5	274.66	0.385391	1.1767	Condition 2	Condition 1	Prostaglandin F2 receptor negative regulator OS=Mus musculus GN=Ptgfrn PE=1 SV=2	156359	84510	108267	158491	126354	125983	225445	132005	118661	188948	126354	115880	3	2	2	2	2	2
P11725	1	1	45.16	0.387891	1.21755	Condition 2	Condition 1	Ornithine carbamoyltransferase, mitochondrial OS=Mus musculus GN=Otc PE=1 SV=1	6325	11612	5759	7945	9422	11485	9120	18139	6312	9472	9422	10564	0	0	0	0	0	1
Q6PAL1	2	2	83	0.395003	1.17767	Condition 1	Condition 2	Draxin OS=Mus musculus GN=Draxin PE=1 SV=2	218032	163018	140937	179571	126665	136999	314368	254633	154467	214079	126665	126013	2	1	0	1	1	1
Q9ET01	4	4	206.61	0.396321	1.11703	Condition 1	Condition 2	Glycogen phosphorylase, liver form OS=Mus musculus GN=Pygl PE=1 SV=4	85629	81104	68399	58847	67811	83839	123463	126685	74966	70155	67811	77115	2	1	1	1	1	3
E9PX95	1	1	42.76	0.407405	1.20306	Condition 1	Condition 2	ATP-binding cassette sub-family A member 17 OS=Mus musculus GN=Abca17 PE=1 SV=1	16846	25340	22754	12301	19316	22362	24289	39581	24938	14665	19316	20569	0	1	0	0	0	0
P70211	3	3	137.23	0.409274	1.27775	Condition 1	Condition 2	Netrin receptor DCC OS=Mus musculus GN=Dcc PE=1 SV=2	46001	35521	43269	51404	33905	12356	66327	55484	47423	61282	33905	11365	1	1	2	0	1	0
P28653	2	2	72.08	0.412385	1.22366	Condition 2	Condition 1	Biglycan OS=Mus musculus GN=Bgn PE=1 SV=1	69426	5778	7080	23551	22566	54571	100101	9025	7760	28076	22566	50194	2	1	0	0	1	1
P12960	1	1	39.17	0.43499	1.10172	Condition 1	Condition 2	Contactin-1 OS=Mus musculus GN=Cntn1 PE=1 SV=1	10496	7503	9289	8418	8528	7823	15133	11720	10181	10035	8528	7196	1	0	0	0	0	0
Q8C4U3	7	7	427.33	0.436023	1.2243	Condition 1	Condition 2	Secreted frizzled-related protein 1 OS=Mus musculus GN=Sfrp1 PE=1 SV=3	756411	597414	494290	383875	297833	827822	1090626	933157	541744	457644	297833	761435	5	4	5	2	4	4
P02769;O35711;P07724;Q8BIQ5	147	125	10396.6	0.43658	1.16981	Condition 1	Condition 2	Contaminant (Serum albumin)	1682334057	2666648850	2373227561	1545297818	2110436159	2090681009	2425661721	4165290646	2601068172	1842254382	2110436159	1923019150	333	394	346	309	316	322
Q8BYI9	13	13	830.36	0.448535	1.26259	Condition 1	Condition 2	Tenascin-R OS=Mus musculus GN=Tnr PE=1 SV=2	1346857	684924	1215789	1113994	746485	711664	1941956	1069848	1332511	1328068	746485	654593	12	6	10	7	2	5
Q922U2;P50446;Q8BGZ7	8	1	486.18	0.461528	1.20436	Condition 2	Condition 1	Keratin, type II cytoskeletal 5 OS=Mus musculus GN=Krt5 PE=1 SV=1	2639	426	12054	5883	2984	9342	3805	665	13211	7013	2984	8593	0	0	1	1	0	1
Q80TE7	1	1	37.85	0.46868	1.28814	Condition 2	Condition 1	Leucine-rich repeat-containing protein 7 OS=Mus musculus GN=Lrrc7 PE=1 SV=2	22474	48354	111445	55669	64984	114140	32404	75529	122144	66367	64984	104986	0	1	0	0	0	0
Q922P8	9	9	511.62	0.470713	1.19235	Condition 1	Condition 2	Transmembrane protein 132A OS=Mus musculus GN=Tmem132a PE=1 SV=2	459327	323236	581597	462893	342791	338411	662277	504893	637433	551846	342791	311272	9	6	7	7	3	3
P13645;P02535;Q8VCW2	27	25	1799.29	0.471957	1.19954	Condition 2	Condition 1	Contaminant (Keratin, type I cytoskeletal 10)	2201435	2246743	5505807	4373176	2991582	4575403	3174124	3509400	6034389	5213560	2991582	4208479	14	13	24	16	15	20
P07141	2	2	80.14	0.471991	1.1524	Condition 1	Condition 2	Macrophage colony-stimulating factor 1 OS=Mus musculus GN=Csf1 PE=1 SV=2	10808	11957	13968	10912	6801	14161	15584	18676	15309	13009	6801	13026	1	0	0	0	0	1
Q09200	2	2	86.72	0.494915	1.21291	Condition 2	Condition 1	Beta-1,4 N-acetylgalactosaminyltransferase 1 OS=Mus musculus GN=B4galnt1 PE=1 SV=1	12835	3254	3838	10999	7569	5601	18506	5082	4206	13113	7569	5152	1	0	0	2	0	0
Q61245	1	1	44.2	0.502243	1.26317	Condition 2	Condition 1	Collagen alpha-1(XI) chain OS=Mus musculus GN=Col11a1 PE=1 SV=2	5941	1399	1599	3809	2122	5361	8566	2185	1753	4541	2122	4931	0	1	0	0	0	0
Q9ER65	23	20	1063.65	0.502907	1.10713	Condition 1	Condition 2	Calsyntenin-2 OS=Mus musculus GN=Clstn2 PE=1 SV=2	1517052	1299379	1692616	1305634	1066129	1700966	2187351	2029623	1855115	1556534	1066129	1564557	8	11	12	12	5	13
Q8CAY6	1	1	35.47	0.506526	1.33009	Condition 2	Condition 1	Acetyl-CoA acetyltransferase, cytosolic OS=Mus musculus GN=Acat2 PE=1 SV=2	42117	207	47134	22997	12931	83059	60726	324	51659	27417	12931	76398	0	0	1	0	0	1
P08249	1	1	33.98	0.512209	3.80572	Condition 2	Condition 1	Malate dehydrogenase, mitochondrial OS=Mus musculus GN=Mdh2 PE=1 SV=3	110	323	2864	317	644	11585	159	504	3139	378	644	10656	0	0	0	0	0	2
P28654	1	1	30.82	0.515324	1.09107	Condition 2	Condition 1	Decorin OS=Mus musculus GN=Dcn PE=1 SV=1	11655	1111	1809	7264	2900	5739	16805	1736	1982	8660	2900	5279	1	0	0	0	0	0
Q8BND5	9	9	487.63	0.518855	1.16828	Condition 1	Condition 2	Sulfhydryl oxidase 1 OS=Mus musculus GN=Qsox1 PE=1 SV=1	743531	445095	447883	529572	413100	458115	1072055	695235	490882	631339	413100	421376	7	2	1	3	3	2
Q6IFX2	2	1	90.59	0.519672	1.32444	Condition 2	Condition 1	Keratin, type I cytoskeletal 42 OS=Mus musculus GN=Krt42 PE=1 SV=1	11199	2766	21079	21244	7329	17840	16147	4321	23103	25327	7329	16410	1	0	0	0	0	0
Q766D5	1	1	28.48	0.531491	1.25907	Condition 1	Condition 2	N-acetyl-beta-glucosaminyl-glycoprotein 4-beta-N-acetylgalactosaminyltransferase 1 OS=Mus musculus GN=B4galnt4 PE=2 SV=1	32989	15684	16717	24482	13843	13609	47566	24498	18322	29187	13843	12518	1	0	0	0	0	0
P68254	3	1	160.72	0.541215	1.34314	Condition 1	Condition 2	14-3-3 protein theta OS=Mus musculus GN=Ywhaq PE=1 SV=1	13767	39415	23197	9329	23116	24421	19850	61566	25424	11122	23116	22462	0	1	1	0	1	0
O08532	3	3	113.03	0.544448	1.35524	Condition 2	Condition 1	Voltage-dependent calcium channel subunit alpha-2/delta-1 OS=Mus musculus GN=Cacna2d1 PE=1 SV=1	22875	9226	8811	31479	11802	12165	32982	14411	9657	37529	11802	11189	2	1	1	3	1	1
Q62165	2	2	105.75	0.558426	1.10625	Condition 1	Condition 2	Dystroglycan OS=Mus musculus GN=Dag1 PE=1 SV=4	165800	135277	124543	99485	107050	178207	239058	211302	136500	118603	107050	163916	2	1	2	2	1	2
Q5MJS3;B2RQC6;Q8CID3	9	8	519.14	0.563852	1.15247	Condition 2	Condition 1	Extracellular serine/threonine protein kinase FAM20C OS=Mus musculus GN=Fam20c PE=1 SV=1	1228427	587403	556837	1207142	765591	761698	1771199	917519	610296	1439116	765591	700614	7	4	3	5	5	5
P14152	1	1	49.05	0.58431	1.09428	Condition 2	Condition 1	Malate dehydrogenase, cytoplasmic OS=Mus musculus GN=Mdh1 PE=1 SV=3	6693	14969	6675	11174	9163	10671	9650	23381	7316	13322	9163	9815	0	1	0	1	0	0
Q9Z2K1	3	1	172.79	0.589004	1.03916	Condition 1	Condition 2	Keratin, type I cytoskeletal 16 OS=Mus musculus GN=Krt16 PE=1 SV=3	17094	841	30021	16391	9549	20209	24647	1313	32903	19540	9549	18588	0	0	1	0	0	0
Q4V9Z5	5	5	280.15	0.591508	1.25345	Condition 1	Condition 2	Seizure 6-like protein 2 OS=Mus musculus GN=Sez6l2 PE=1 SV=1	415066	222563	170214	277661	181116	185718	598461	347642	186555	331019	181116	170824	4	2	1	3	1	2
Q7TPR4;O88990	3	3	188.96	0.612597	1.25863	Condition 1	Condition 2	Alpha-actinin-1 OS=Mus musculus GN=Actn1 PE=1 SV=1	35374	29090	75095	30142	23444	57296	51003	45439	82305	35934	23444	52701	1	4	3	1	1	2
Q06890	10	10	588.63	0.615499	1.11871	Condition 1	Condition 2	Clusterin OS=Mus musculus GN=Clu PE=1 SV=1	1404803	939297	931265	1082484	649648	1195665	2025505	1467177	1020670	1290503	649648	1099778	9	6	8	5	4	8
P21956	8	8	438.32	0.61587	1.07861	Condition 1	Condition 2	Lactadherin OS=Mus musculus GN=Mfge8 PE=1 SV=3	514655	391513	405237	327625	373719	514488	742051	611541	444142	390584	373719	473228	9	3	3	1	5	4
Q61330	17	17	1063.6	0.626247	1.11524	Condition 1	Condition 2	Contactin-2 OS=Mus musculus GN=Cntn2 PE=1 SV=2	1468235	976994	1608547	1352655	983504	1298717	2116965	1526060	1762975	1612592	983504	1194566	14	10	15	16	8	13
P55002	1	1	47.26	0.635646	1.16782	Condition 1	Condition 2	Microfibrillar-associated protein 2 OS=Mus musculus GN=Mfap2 PE=2 SV=1	50951	31279	24921	32883	25791	33080	73464	48857	27314	39202	25791	30427	1	0	1	1	1	1
Q810C1	3	2	151.06	0.638083	1.00883	Condition 2	Condition 1	SLIT and NTRK-like protein 1 OS=Mus musculus GN=Slitrk1 PE=2 SV=1	40015	10959	5659	25814	17660	13660	57696	17118	6203	30774	17660	12565	2	0	0	0	0	0
P0C192;Q8C031;Q99PH1	7	7	351.33	0.640293	1.10087	Condition 2	Condition 1	Leucine-rich repeat-containing protein 4B OS=Mus musculus GN=Lrrc4b PE=1 SV=1	644473	307822	301199	538075	343532	498325	929229	480817	330115	641476	343532	458362	4	3	3	8	4	3
P11247	1	1	45.41	0.645039	1.10049	Condition 2	Condition 1	Myeloperoxidase OS=Mus musculus GN=Mpo PE=1 SV=2	6667842	9328882	11442150	7769855	10135513	12290848	9613982	14571661	12540648	9262972	10135513	11305185	1	2	1	2	2	2
Q61220	44	43	2971.8	0.645192	1.07817	Condition 1	Condition 2	Protein kinase C-binding protein NELL2 OS=Mus musculus GN=Nell2 PE=1 SV=3	20311081	14487358	14288991	17223013	13820877	14484509	29285391	22629172	15660799	20532722	13820877	13322926	47	28	32	36	32	34
Q6ZQ38	1	1	45.08	0.652465	1.56452	Condition 1	Condition 2	Cullin-associated NEDD8-dissociated protein 1 OS=Mus musculus GN=Cand1 PE=1 SV=2	4015	1987	10212	3907	2946	3511	5789	3104	11192	4658	2946	3229	0	0	1	0	0	0
Q69ZK9	5	1	252.1	0.653264	1.16061	Condition 1	Condition 2	Neuroligin-2 OS=Mus musculus GN=Nlgn2 PE=1 SV=2	51189	24199	36756	43965	26375	26284	73806	37799	40285	52413	26375	24177	1	0	0	0	0	0
P35908;P07744;P19246;Q3TTY5	23	16	1411.91	0.663511	1.1414	Condition 2	Condition 1	Contaminant (Keratin, type II cytoskeletal 2 epidermal)	455923	582776	1138413	951084	509343	1024519	657370	910292	1247706	1133852	509343	942357	5	11	15	11	5	14
Q9CS84;P0DI97	21	18	1319.25	0.671792	1.0973	Condition 1	Condition 2	Neurexin-1 OS=Mus musculus GN=Nrxn1 PE=1 SV=3	1500902	995504	985421	1315266	1130796	727016	2164065	1554971	1080026	1568018	1130796	668714	15	14	10	14	8	5
Q61543	3	3	163.42	0.677153	1.11464	Condition 1	Condition 2	Golgi apparatus protein 1 OS=Mus musculus GN=Glg1 PE=1 SV=1	34276	21584	39094	26613	17932	40643	49420	33714	42847	31727	17932	37383	2	2	1	2	1	4
Q8JZM4	2	2	114.16	0.689837	1.05648	Condition 2	Condition 1	Delta and Notch-like epidermal growth factor-related receptor OS=Mus musculus GN=Dner PE=1 SV=1	45926	50245	18915	44610	35811	41165	66218	78482	20731	53183	35811	37863	2	3	1	1	1	1
Q9DC11	1	1	59.89	0.701041	1.13115	Condition 2	Condition 1	Plexin domain-containing protein 2 OS=Mus musculus GN=Plxdc2 PE=1 SV=1	19661	16049	7251	10766	14602	23227	28348	25068	7948	12835	14602	21364	1	2	0	1	1	1
Q71M36	3	3	223.93	0.704205	1.05333	Condition 2	Condition 1	Chondroitin sulfate proteoglycan 5 OS=Mus musculus GN=Cspg5 PE=1 SV=2	252672	417305	262455	374254	321927	285975	364314	651828	287652	446173	321927	263042	3	3	3	3	3	3
Q8BHN0	1	1	60.24	0.708413	1.28115	Condition 1	Condition 2	Protein phosphatase 1L OS=Mus musculus GN=Ppm1l PE=1 SV=1	37119	12665	14012	21279	10881	17636	53519	19782	15357	25368	10881	16222	1	0	0	1	1	0
O89026	6	6	238.98	0.70999	1.06656	Condition 1	Condition 2	Roundabout homolog 1 OS=Mus musculus GN=Robo1 PE=1 SV=1	193151	131815	145065	165871	120191	154637	278494	205895	158992	197746	120191	142235	2	2	2	4	2	1
P52800	1	1	49.74	0.718064	1.06363	Condition 1	Condition 2	Ephrin-B2 OS=Mus musculus GN=Efnb2 PE=1 SV=1	9226	4474	7736	3759	4217	12178	13302	6989	8479	4481	4217	11201	0	0	0	0	0	2
Q8R5M8	1	1	65.93	0.718332	1.02726	Condition 2	Condition 1	Cell adhesion molecule 1 OS=Mus musculus GN=Cadm1 PE=1 SV=2	227948	68213	52429	174863	97388	85840	328666	106548	57463	208467	97388	78956	1	1	1	1	1	1
Q08879	3	3	213.21	0.72165	1.10431	Condition 2	Condition 1	Fibulin-1 OS=Mus musculus GN=Fbln1 PE=1 SV=2	139658	60022	122185	124396	78613	152431	201364	93754	133915	148301	78613	140207	2	1	1	1	1	3
Q7TSK3	2	2	127.92	0.729702	1.08798	Condition 1	Condition 2	Protocadherin-8 OS=Mus musculus GN=Pcdh8 PE=1 SV=1	44712	32373	57165	51658	25956	45781	64467	50567	62653	61585	25956	42109	0	1	1	2	1	1
P11499;Q9CQN1	6	3	322.44	0.734014	1.06038	Condition 1	Condition 2	Heat shock protein HSP 90-beta OS=Mus musculus GN=Hsp90ab1 PE=1 SV=3	56981	55681	38981	58011	58152	26845	82158	86973	42724	69159	58152	24692	2	0	1	1	3	1
Q9ER58	17	17	1018.36	0.734022	1.05952	Condition 1	Condition 2	Testican-2 OS=Mus musculus GN=Spock2 PE=1 SV=1	3393878	3609733	2493770	2727224	3634622	2601976	4893439	5638382	2733183	3251308	3634622	2393311	12	13	12	15	12	10
Q99JH7;Q91ZI0	34	33	2281.47	0.73763	1.05675	Condition 1	Condition 2	Calsyntenin-3 OS=Mus musculus GN=Clstn3 PE=1 SV=1	17856141	15260600	12364359	15562533	16439385	11036707	25745753	23836971	13551393	18553152	16439385	10151620	34	34	25	32	36	20
Q61207	3	3	123.05	0.746245	1.12421	Condition 1	Condition 2	Prosaposin OS=Mus musculus GN=Psap PE=1 SV=2	158625	72871	93787	116676	56972	115695	228713	113824	102791	139098	56972	106417	1	0	0	1	0	1
Q811B1	2	2	101.66	0.75115	1.08029	Condition 1	Condition 2	Xylosyltransferase 1 OS=Mus musculus GN=Xylt1 PE=2 SV=1	68235	43340	70850	59577	54821	54468	98384	67696	77652	71025	54821	50100	2	1	3	1	0	1
Q61809	2	2	76.57	0.759627	1.18943	Condition 1	Condition 2	Leucine-rich repeat neuronal protein 1 OS=Mus musculus GN=Lrrn1 PE=2 SV=1	75507	25211	39633	55589	23191	39219	108869	39380	43438	66272	23191	36074	2	0	0	0	0	0
P61982	7	5	351.71	0.761683	1.12127	Condition 2	Condition 1	14-3-3 protein gamma OS=Mus musculus GN=Ywhag PE=1 SV=2	81518	125297	50783	59050	88535	141250	117536	195713	55658	70398	88535	129923	1	4	0	0	3	4
P35822	4	4	163.48	0.76607	1.07855	Condition 2	Condition 1	Receptor-type tyrosine-protein phosphatase kappa OS=Mus musculus GN=Ptprk PE=1 SV=1	171448	112419	99176	183739	103677	125716	247201	175597	108697	219048	103677	115634	3	1	1	2	2	1
Q80TR4;Q9R1B9	3	3	105.02	0.778703	1.12462	Condition 1	Condition 2	Slit homolog 1 protein OS=Mus musculus GN=Slit1 PE=1 SV=2	46698	22795	50431	44727	23180	38729	67331	35606	55273	53322	23180	35623	2	1	2	0	0	0
Q9CZ28	1	1	44.89	0.782877	1.08521	Condition 1	Condition 2	Vacuolar-sorting protein SNF8 OS=Mus musculus GN=Snf8 PE=1 SV=1	9804	9272	5611	7508	7762	7478	14135	14482	6149	8951	7762	6878	0	1	1	1	1	1
Q01853	10	9	478.18	0.783484	1.1072	Condition 1	Condition 2	Transitional endoplasmic reticulum ATPase OS=Mus musculus GN=Vcp PE=1 SV=4	460096	202246	407738	405762	172792	387921	663387	315907	446882	483737	172792	356811	4	3	3	6	2	3
Q8BKV0	1	1	93.82	0.788998	1.11771	Condition 1	Condition 2	Testican-3 OS=Mus musculus GN=Spock3 PE=2 SV=2	42075	92563	71391	52638	76194	55499	60666	144582	78245	62754	76194	51048	1	0	0	1	0	1
Q924X6	1	1	37.72	0.790921	1.01792	Condition 1	Condition 2	Low-density lipoprotein receptor-related protein 8 OS=Mus musculus GN=Lrp8 PE=1 SV=2	37851	7842	13105	23893	11218	22652	54575	12249	14363	28484	11218	20835	1	0	0	0	0	0
Q68FD5	1	1	45.37	0.799578	1.36977	Condition 1	Condition 2	Clathrin heavy chain 1 OS=Mus musculus GN=Cltc PE=1 SV=3	4563	1394	10070	6003	1355	4343	6580	2177	11037	7157	1355	3995	0	0	1	0	0	0
P10493	7	7	401.27	0.799724	1.12207	Condition 1	Condition 2	Nidogen-1 OS=Mus musculus GN=Nid1 PE=1 SV=2	329866	52786	76534	154743	81541	172947	475616	82452	83882	184480	81541	159077	6	0	2	1	3	3
Q8BKC5	1	1	44.18	0.81163	1.35756	Condition 1	Condition 2	Importin-5 OS=Mus musculus GN=Ipo5 PE=1 SV=3	3409	1112	5885	2760	1665	3240	4915	1738	6450	3291	1665	2980	0	0	1	0	0	0
Q62288	12	11	687.02	0.812996	1.01635	Condition 1	Condition 2	Testican-1 OS=Mus musculus GN=Spock1 PE=2 SV=2	787564	819631	772217	724503	975915	640720	1135543	1280259	846353	863729	975915	589338	9	4	9	7	6	4
P35802	2	2	78.79	0.815662	1.08107	Condition 2	Condition 1	Neuronal membrane glycoprotein M6-a OS=Mus musculus GN=Gpm6a PE=1 SV=1	85920	58923	65389	67620	55205	104451	123883	92038	71666	80614	55205	96074	1	0	0	0	0	1
Q9Z1M7	4	4	159.22	0.81648	1.03245	Condition 2	Condition 1	LARGE xylosyl- and glucuronyltransferase 1 OS=Mus musculus GN=Large1 PE=1 SV=1	163118	69037	119646	156678	99803	106737	235190	107835	131133	186786	99803	98178	2	0	0	2	0	1
P06151;P00342	2	1	123.14	0.823209	1.27352	Condition 2	Condition 1	L-lactate dehydrogenase A chain OS=Mus musculus GN=Ldha PE=1 SV=3	5867	9904	9547	10578	4145	17520	8460	15470	10463	12611	4145	16115	0	1	0	0	0	0
Q04592	1	1	39.12	0.8242	1.04169	Condition 2	Condition 1	Proprotein convertase subtilisin/kexin type 5 OS=Mus musculus GN=Pcsk5 PE=1 SV=3	19199	7369	10849	18252	10996	9729	27682	11511	11890	21759	10996	8949	1	0	0	1	0	0
A2ASQ1	8	8	477.38	0.827857	1.05991	Condition 1	Condition 2	Agrin OS=Mus musculus GN=Agrn PE=1 SV=1	586822	412704	316295	559874	379235	302337	846105	644641	346661	667464	379235	278091	7	6	2	6	6	3
Q9EPL2;P61216;Q8BN58	49	46	3448.67	0.830374	1.11297	Condition 1	Condition 2	Calsyntenin-1 OS=Mus musculus GN=Clstn1 PE=1 SV=1	91265022	53267903	39681532	66846664	56307466	42361703	131589840	83204168	43491139	79692443	56307466	38964512	63	45	40	53	48	45
Q2VWQ2	2	2	110.88	0.830775	1.08267	Condition 2	Condition 1	Protein kinase C-binding protein NELL1 OS=Mus musculus GN=Nell1 PE=2 SV=1	35135	33987	32124	42363	43362	23891	50660	53088	35208	50504	43362	21975	2	2	1	3	2	0
Q8R4G6	18	17	1195.57	0.831845	1.00422	Condition 2	Condition 1	Alpha-1,6-mannosylglycoprotein 6-beta-N-acetylglucosaminyltransferase A OS=Mus musculus GN=Mgat5 PE=2 SV=1	2801133	1257769	1297983	2210018	1610442	1559019	4038795	1964628	1422595	2634713	1610442	1433994	23	14	10	18	14	13
P63101;O70456	7	5	364.81	0.843782	1.14876	Condition 2	Condition 1	14-3-3 protein zeta/delta OS=Mus musculus GN=Ywhaz PE=1 SV=1	384601	424465	332441	297572	311351	702390	554534	663012	364357	354756	311351	646062	3	2	1	1	2	3
P62979	1	1	42.57	0.84442	1.00289	Condition 2	Condition 1	Contaminant (Ubiquitin-40S ribosomal protein S27a)	171736	80093	138913	143675	121418	126776	247616	125104	152249	171285	121418	116609	0	1	0	2	0	0
B9EKR1	10	10	729.25	0.84566	1.03892	Condition 2	Condition 1	Receptor-type tyrosine-protein phosphatase zeta OS=Mus musculus GN=Ptprz1 PE=1 SV=1	2915573	2026629	1455383	2850283	2152152	1644152	4203799	3165583	1595106	3398015	2152152	1512300	13	9	10	15	9	10
Q3UHN9;P52850	5	5	249.02	0.849327	1.01453	Condition 2	Condition 1	Bifunctional heparan sulfate N-deacetylase/N-sulfotransferase 1 OS=Mus musculus GN=Ndst1 PE=1 SV=2	197917	132755	134756	169358	162625	140207	285365	207362	147693	201903	162625	128963	4	4	1	2	2	2
Q8CAE9	5	5	211.01	0.851456	1.14309	Condition 1	Condition 2	Podocalyxin-like protein 2 OS=Mus musculus GN=Podxl2 PE=1 SV=2	720872	265403	283726	554777	261937	294306	1039384	414558	310965	661388	261937	270704	3	1	0	3	1	3
P12023	42	38	2890.12	0.859927	1.01392	Condition 2	Condition 1	Amyloid beta A4 protein OS=Mus musculus GN=App PE=1 SV=3	55256730	40918165	30158538	49727881	41335441	37029232	79671534	63913945	33053895	59283981	41335441	34059678	49	47	31	56	49	38
Q64692	10	9	582.76	0.866279	1.13127	Condition 1	Condition 2	CMP-N-acetylneuraminate-poly-alpha-2,8-sialyltransferase OS=Mus musculus GN=St8sia4 PE=2 SV=1	585661	292752	216769	431396	276540	260161	844431	457277	237579	514297	276540	239297	7	3	3	7	5	1
O35696	11	10	779.6	0.867571	1.11841	Condition 1	Condition 2	Alpha-2,8-sialyltransferase 8B OS=Mus musculus GN=St8sia2 PE=2 SV=2	1688342	841528	624855	1338070	761119	721524	2434325	1314462	684844	1595204	761119	663662	11	6	1	7	5	3
Q5STE3	1	1	46.9	0.869689	1.05089	Condition 1	Condition 2	Follistatin-related protein 4 OS=Mus musculus GN=Fstl4 PE=2 SV=1	9429	5340	10254	10473	8123	5215	13594	8341	11239	12485	8123	4797	0	1	0	0	0	0
Q6P1D5;Q925J9	14	14	881.14	0.871344	1.01283	Condition 1	Condition 2	Seizure 6-like protein OS=Mus musculus GN=Sez6l PE=1 SV=1	4961795	2500821	1566852	4120694	2428563	2365806	7154130	3906268	1717277	4912558	2428563	2176081	14	11	5	14	9	9
P07901	5	2	279.83	0.87274	1.06804	Condition 2	Condition 1	Heat shock protein HSP 90-alpha OS=Mus musculus GN=Hsp90aa1 PE=1 SV=4	70421	48600	37868	80902	48252	38411	101535	75913	41504	96448	48252	35331	1	1	2	1	0	1
Q03157;P21784	25	25	1772.13	0.873838	1.03968	Condition 2	Condition 1	Amyloid-like protein 1 OS=Mus musculus GN=Aplp1 PE=1 SV=1	22768743	16708228	13760535	21882288	20336654	13130789	32828955	26098158	15081609	26087360	20336654	12077767	29	22	27	29	26	17
P55065	4	3	178.77	0.873941	1.14515	Condition 1	Condition 2	Phospholipid transfer protein OS=Mus musculus GN=Pltp PE=1 SV=1	29180	5794	36196	17020	6202	38927	42073	9049	39671	20291	6202	35805	1	0	3	1	0	2
P26339	7	6	397.98	0.875316	1.04497	Condition 1	Condition 2	Chromogranin-A OS=Mus musculus GN=Chga PE=1 SV=1	387238	312130	233723	331872	276052	285017	558337	487545	256162	395647	276052	262160	3	5	5	4	5	4
Q07797	3	3	104.22	0.875922	1.01361	Condition 1	Condition 2	Galectin-3-binding protein OS=Mus musculus GN=Lgals3bp PE=1 SV=1	45558	49830	26109	30709	25560	63597	65687	77835	28616	36611	25560	58497	1	0	0	1	0	1
P15116	3	3	202.49	0.889256	1.05442	Condition 2	Condition 1	Cadherin-2 OS=Mus musculus GN=Cdh2 PE=1 SV=2	432844	265360	311505	618771	193276	252610	624093	414492	341410	737679	193276	232352	5	1	3	2	2	3
P35951	6	6	388.63	0.895045	1.05599	Condition 1	Condition 2	Low-density lipoprotein receptor OS=Mus musculus GN=Ldlr PE=1 SV=2	353735	163058	118056	237444	185400	178346	510030	254695	129390	283073	185400	164044	8	3	1	5	3	3
O35188	4	4	253.54	0.895481	1.09125	Condition 1	Condition 2	Fractalkine OS=Mus musculus GN=Cx3cl1 PE=1 SV=3	362347	248768	91303	211496	235640	196545	522447	388574	100068	252139	235640	180783	4	4	1	3	4	5
Q99K10	5	2	297.78	0.901746	1.04806	Condition 1	Condition 2	Neuroligin-1 OS=Mus musculus GN=Nlgn1 PE=1 SV=2	169173	139410	87620	162250	115981	99802	243921	217757	96032	193429	115981	91799	2	0	0	2	0	1
Q08890	8	8	379.02	0.902416	1.00068	Condition 1	Condition 2	Iduronate 2-sulfatase OS=Mus musculus GN=Ids PE=2 SV=3	757331	461135	423903	640098	479858	521306	1091953	720290	464599	763104	479858	479500	4	5	1	4	3	3
Q62059	3	3	141.76	0.910311	1.00779	Condition 2	Condition 1	Versican core protein OS=Mus musculus GN=Vcan PE=1 SV=2	98076	48362	30373	81762	64317	32108	141411	75541	33289	97474	64317	29533	3	1	0	3	0	1
P11087	1	1	29.59	0.912532	1.81149	Condition 1	Condition 2	Collagen alpha-1(I) chain OS=Mus musculus GN=Col1a1 PE=1 SV=4	8004	449	795	1420	426	3260	11541	702	872	1693	426	2998	1	0	0	0	0	0
P97798	23	23	1311.56	0.919395	1.01273	Condition 1	Condition 2	Neogenin OS=Mus musculus GN=Neo1 PE=1 SV=1	3415717	1788940	1346691	2876706	2014721	1577580	4924928	2794314	1475979	3429516	2014721	1451066	22	16	9	16	9	11
P14869	1	1	38.11	0.919657	1.25884	Condition 1	Condition 2	60S acidic ribosomal protein P0 OS=Mus musculus GN=Rplp0 PE=1 SV=3	9144	6776	1951	4135	5553	4508	13184	10585	2138	4930	5553	4147	0	1	0	0	0	0
Q8BRK9	4	4	265.1	0.921356	1.0705	Condition 1	Condition 2	Alpha-mannosidase 2x OS=Mus musculus GN=Man2a2 PE=1 SV=2	136079	64665	66948	110357	71494	68212	196204	101007	73375	131564	71494	62742	4	3	0	3	0	1
Q80YX1	6	6	280.62	0.926782	1.07389	Condition 1	Condition 2	Tenascin OS=Mus musculus GN=Tnc PE=1 SV=1	364963	128738	140295	321405	125129	143841	526219	201088	153764	383169	125129	132306	5	3	3	4	2	2
O88998	7	7	403.57	0.928404	1.04912	Condition 1	Condition 2	Noelin OS=Mus musculus GN=Olfm1 PE=1 SV=1	322654	182389	186055	259918	208750	190070	465217	284891	203917	309866	208750	174827	7	1	2	2	0	3
Q99LL3	1	1	50.08	0.929999	1.21717	Condition 1	Condition 2	Carbohydrate sulfotransferase 12 OS=Mus musculus GN=Chst12 PE=2 SV=2	24915	15303	5936	13117	11658	13144	35923	23903	6506	15638	11658	12089	1	1	0	0	0	0
Q60841	12	12	610.07	0.932383	1.08623	Condition 1	Condition 2	Reelin OS=Mus musculus GN=Reln PE=1 SV=3	1598996	662324	1390524	1357884	953395	1050678	2305501	1034546	1524020	1618826	953395	966419	10	7	6	9	6	7
Q9DBJ1	2	2	75.06	0.934068	1.03301	Condition 1	Condition 2	Phosphoglycerate mutase 1 OS=Mus musculus GN=Pgam1 PE=1 SV=3	88999	58297	29594	52381	42023	76834	128322	91059	32435	62447	42023	70672	0	1	0	0	0	2
P16125	2	1	110.81	0.93908	1.16472	Condition 2	Condition 1	L-lactate dehydrogenase B chain OS=Mus musculus GN=Ldhb PE=1 SV=2	19089	11309	12667	14433	7411	28316	27524	17664	13883	17206	7411	26045	1	0	0	0	0	0
P70232	68	68	4650.19	0.945942	1.06333	Condition 1	Condition 2	Neural cell adhesion molecule L1-like protein OS=Mus musculus GN=Chl1 PE=1 SV=2	93752046	44848064	36726203	78637064	49750609	36497059	135175739	70052426	40252086	93748580	49750609	33570183	96	66	54	76	57	51
Q7TSK2	15	15	1165.25	0.947334	1.00856	Condition 1	Condition 2	Seizure protein 6 OS=Mus musculus GN=Sez6 PE=1 SV=1	9700577	4887367	4788589	8638259	5082601	5491140	13986710	7634041	5248315	10298254	5082601	5050779	21	12	14	22	15	15
P62874	1	1	49.84	0.948477	1.3939	Condition 2	Condition 1	Guanine nucleotide-binding protein G(I)/G(S)/G(T) subunit beta-1 OS=Mus musculus GN=Gnb1 PE=1 SV=3	2237	1098	3124	2559	418	6027	3225	1715	3424	3051	418	5544	0	0	0	0	0	1
Q06335	17	13	1135.02	0.950269	1.03331	Condition 1	Condition 2	Amyloid-like protein 2 OS=Mus musculus GN=Aplp2 PE=1 SV=4	3962710	3501722	2302057	3588398	2979885	2883413	5713606	5469671	2523065	4277972	2979885	2652178	12	10	7	10	7	10
Q8VCC9	1	1	56.08	0.954114	1.07858	Condition 1	Condition 2	Spondin-1 OS=Mus musculus GN=Spon1 PE=1 SV=1	14064	38982	26323	25142	31133	17311	20278	60889	28850	29973	31133	15923	0	1	0	0	0	0
Q61361	27	27	1661.5	0.958016	1.0428	Condition 1	Condition 2	Brevican core protein OS=Mus musculus GN=Bcan PE=1 SV=2	7086355	3914095	3055686	6011235	4500882	2967115	10217412	6113795	3349045	7166401	4500882	2729167	30	21	16	25	18	18
P55066;Q61282;Q8BSD4	33	33	2456.93	0.958463	1.05816	Condition 1	Condition 2	Neurocan core protein OS=Mus musculus GN=Ncan PE=1 SV=1	16260133	7746221	6522470	13929086	7354475	7567271	23444561	12099553	7148657	16605809	7354475	6960415	43	35	28	32	22	20
P13595	22	22	1334.3	0.960115	1.07402	Condition 1	Condition 2	Neural cell adhesion molecule 1 OS=Mus musculus GN=Ncam1 PE=1 SV=3	7018247	2494606	2439037	5135956	2655382	3336871	10119211	3896561	2673196	6122922	2655382	3069272	22	12	11	21	12	14
Q6ZQA6	1	1	42.34	0.961315	1.02031	Condition 2	Condition 1	Immunoglobulin superfamily member 3 OS=Mus musculus GN=Igsf3 PE=1 SV=2	2970	2285	1524	2498	2952	1466	4282	3569	1670	2978	2952	1348	0	0	0	0	1	0
P16056	2	2	93.42	0.962005	1.07354	Condition 2	Condition 1	Hepatocyte growth factor receptor OS=Mus musculus GN=Met PE=1 SV=1	19687	12057	9949	24398	13785	6577	28386	18833	10904	29086	13785	6050	3	1	0	1	2	1
Q64487	4	3	271.15	0.969225	1.0018	Condition 2	Condition 1	Receptor-type tyrosine-protein phosphatase delta OS=Mus musculus GN=Ptprd PE=1 SV=3	67134	55960	64129	74005	53291	60264	96797	87409	70285	88226	53291	55431	2	2	1	4	2	2
Q810U4	37	37	2618.73	0.970894	1.03793	Condition 1	Condition 2	Neuronal cell adhesion molecule OS=Mus musculus GN=Nrcam PE=1 SV=2	13770628	8334898	5251625	10941231	10285368	5130739	19855085	13019065	5755804	13043784	10285368	4719280	32	35	25	29	28	23
Q6P9K9;Q8C985	8	6	464	0.970929	1.04875	Condition 1	Condition 2	Neurexin-3 OS=Mus musculus GN=Nrxn3 PE=1 SV=2	231661	104438	166249	198297	144246	136452	334018	163132	182210	236404	144246	125509	4	1	7	2	4	3
Q9QZF2	1	1	31.48	0.971442	1.01766	Condition 1	Condition 2	Glypican-1 OS=Mus musculus GN=Gpc1 PE=1 SV=1	23522	13845	13125	21898	15404	12315	33915	21626	14386	26106	15404	11327	1	0	0	0	0	0
O88322	1	1	56.16	0.972688	2.08115	Condition 1	Condition 2	Nidogen-2 OS=Mus musculus GN=Nid2 PE=1 SV=2	29146	1801	465	12233	2016	845	42024	2814	509	14584	2016	777	1	0	0	0	0	0
P11627	13	13	736.57	0.973285	1.04155	Condition 1	Condition 2	Neural cell adhesion molecule L1 OS=Mus musculus GN=L1cam PE=1 SV=1	3176616	1477678	1213589	2816879	1616042	1200889	4580181	2308124	1330100	3358193	1616042	1104584	13	7	6	7	6	5
P02787	27	27	1598.5	0.974669	1.01228	Condition 2	Condition 1	Contaminant (Serotransferrin)	943499	1166597	3198746	778017	1293996	3302024	1360378	1822218	3505840	927527	1293996	3037218	10	13	22	9	17	26
P70663	30	30	2148.99	0.978378	1.02921	Condition 1	Condition 2	SPARC-like protein 1 OS=Mus musculus GN=Sparcl1 PE=1 SV=3	29498582	24085624	17151286	23334204	22849189	22544325	42532326	37621610	18797887	27818288	22849189	20736386	40	25	35	28	33	28
Q9D1T0	7	5	389.42	0.978893	1.0233	Condition 1	Condition 2	Leucine-rich repeat and immunoglobulin-like domain-containing nogo receptor-interacting protein 1 OS=Mus musculus GN=Lingo1 PE=1 SV=1	600371	407830	303136	562272	366289	352917	865640	637028	332238	670322	366289	324615	5	2	2	4	2	2
P62259	7	5	368.26	0.993806	1.02579	Condition 1	Condition 2	14-3-3 protein epsilon OS=Mus musculus GN=Ywhae PE=1 SV=1	176744	215199	99815	132967	137748	208679	254837	336139	109398	158519	137748	191944	3	3	3	4	3	2
B0F2B4	10	7	655.25	0.994011	1.04087	Condition 1	Condition 2	Neuroligin 4-like OS=Mus musculus GN=Nlgn4l PE=1 SV=1	1122842	641529	517961	902879	633681	656149	1618963	1002065	567687	1076384	633681	603529	7	7	6	6	8	6
Q8BYM5	7	5	432.16	0.998518	1.01298	Condition 1	Condition 2	Neuroligin-3 OS=Mus musculus GN=Nlgn3 PE=1 SV=2	1112879	747663	758840	969908	772736	843177	1604597	1167846	831692	1156293	772736	775558	6	4	5	7	3	4
B0V2N1	9	8	488.07	0.999679	1.00747	Condition 1	Condition 2	Receptor-type tyrosine-protein phosphatase S OS=Mus musculus GN=Ptprs PE=1 SV=1	310691	196309	267662	286652	206766	275497	447967	306634	293359	341738	206766	253404	5	2	4	5	2	3
Q5SW75	1	0	46.18			---	---	Protein phosphatase Slingshot homolog 2 OS=Mus musculus GN=Ssh2 PE=1 SV=2							0	0	0	0	0	0	0	0	0	0	0	0
P41242	1	0	42.15			---	---	Megakaryocyte-associated tyrosine-protein kinase OS=Mus musculus GN=Matk PE=1 SV=2							0	0	0	0	0	0	0	0	0	0	0	0
Q6NXH9	4	0	233.05			---	---	Keratin, type II cytoskeletal 73 OS=Mus musculus GN=Krt73 PE=1 SV=1							0	0	0	0	0	0	0	0	0	0	0	0
Q91ZU6	2	0	89.12			---	---	Dystonin OS=Mus musculus GN=Dst PE=1 SV=2							0	0	0	0	0	0	0	0	0	0	0	0
Q61414;P19001	3	0	197.07			---	---	Keratin, type I cytoskeletal 15 OS=Mus musculus GN=Krt15 PE=1 SV=2							0	0	0	0	0	0	0	0	0	0	0	0
Q8VED5	3	0	201.84			---	---	Keratin, type II cytoskeletal 79 OS=Mus musculus GN=Krt79 PE=1 SV=2							0	0	0	0	0	0	0	0	0	0	0	0
O55201	1	0	44.92			---	---	Transcription elongation factor SPT5 OS=Mus musculus GN=Supt5h PE=1 SV=1							0	0	0	0	0	0	0	0	0	0	0	0
Q91YM2	1	0	40.49			---	---	Rho GTPase-activating protein 35 OS=Mus musculus GN=Arhgap35 PE=1 SV=3							0	0	0	0	0	0	0	0	0	0	0	0
Q8K296	1	0	35.45			---	---	Myotubularin-related protein 3 OS=Mus musculus GN=Mtmr3 PE=1 SV=2							0	0	0	0	0	0	0	0	0	0	0	0
Q8VBZ0	1	0	28.42			---	---	Dehydrogenase/reductase SDR family member on chromosome X homolog OS=Mus musculus GN=Dhrsx PE=1 SV=2							0	0	0	0	0	0	0	0	0	0	0	0
Q8BFZ3	3	0	97.2			---	---	Beta-actin-like protein 2 OS=Mus musculus GN=Actbl2 PE=1 SV=1							0	0	0	0	0	0	0	0	0	0	0	0
Q8BX17	1	0	40.21			---	---	Gem-associated protein 5 OS=Mus musculus GN=Gemin5 PE=1 SV=2							0	0	0	0	0	0	0	0	0	0	0	0
Q8K2Z4	1	0	53.6			---	---	Condensin complex subunit 1 OS=Mus musculus GN=Ncapd2 PE=1 SV=2							0	0	0	0	0	0	0	0	0	0	0	0
P49138	1	0	43.94			---	---	MAP kinase-activated protein kinase 2 OS=Mus musculus GN=Mapkapk2 PE=1 SV=2							0	0	0	0	0	0	0	0	0	0	0	0
P68510	3	0	138.09			---	---	14-3-3 protein eta OS=Mus musculus GN=Ywhah PE=1 SV=2							0	0	0	0	0	0	0	0	0	0	0	0
